# Supplementary material
Source: PubMed Central journal article supplement (PMC3887818)
Supplement: molcell-34-2-185-11-supplementary.pdf [file molcell-34-2-185-11-supplementary.pdf]

## Supplementary Figure 1

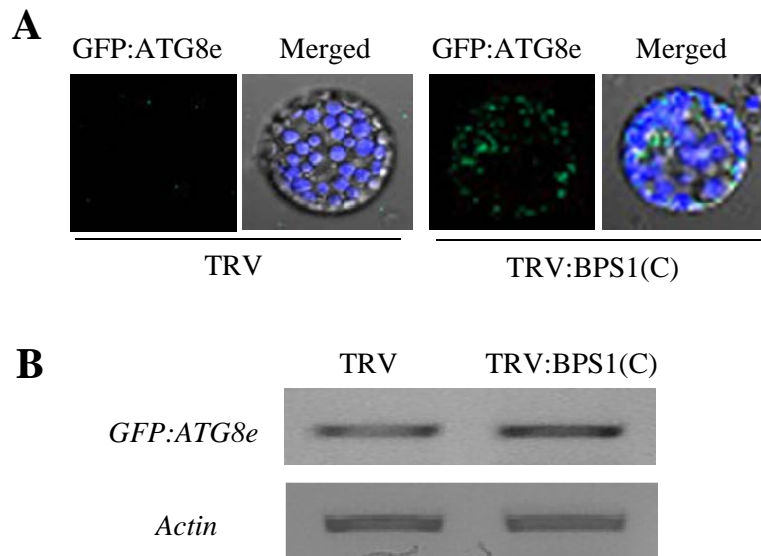

- A) Confocal microscopy of transiently expressed GFP:ATG8e in leaf protoplasts isolated from TRV and TRV:BPS1(C) lines at 15 DAI. Merged images of GFP:bZIP28 fluorescence and chlorophyll autofluorescence (pseudo-colored blue) are also shown.
- B) Semiquantitative RT-PCR showing transient expression of the *GFP:ATG8e* transcripts in infiltrated leaves of TRV and TRV:BPS1(C) lines.
